# Supplementary material for: Magnetic matchstick micromotors with switchable motion modes
Source: Royal Society of Chemistry journal article supplement (doi:10.1039/d1cc00773d), 2021-01-01
Supplement: d1cc00773d1.pdf [file d1cc00773d1.pdf]

## Electronic Supplementary Information (ESI)

### Magnetic matchstick micromotors with switchable motion modes

Xiaoliang Zhang,<sup>[a]</sup> Wenqing Xie,<sup>[a]</sup> Huaguang Wang,\*<sup>[a]</sup> Zexin Zhang\*<sup>[a,b]</sup>

<sup>a</sup> College of Chemistry, Chemical Engineering and Materials Science, Soochow University, Suzhou 215123, China.

<sup>b</sup> Center for Soft Condensed Matter Physics and Interdisciplinary Research, and Institute for Advanced Study, Soochow University, Suzhou 215123, China

\* E-mail: hgwang@suda.edu.cn, zhangzx@suda.edu.cn

#### 1. Supporting Videos

Videos were recorded at 10 frames per second by a Basler ACE camera fitted on an Olympus IX73 microscope.

**Video S1.** Showing the switching of the motion modes of magnetic matchstick micromotors by an external magnetic field (AVI format). The color coding of the trajectory corresponds to timestamps: blue ( $t = 0$  s) and red ( $t = 12$  s)

#### 2. Supporting Figures

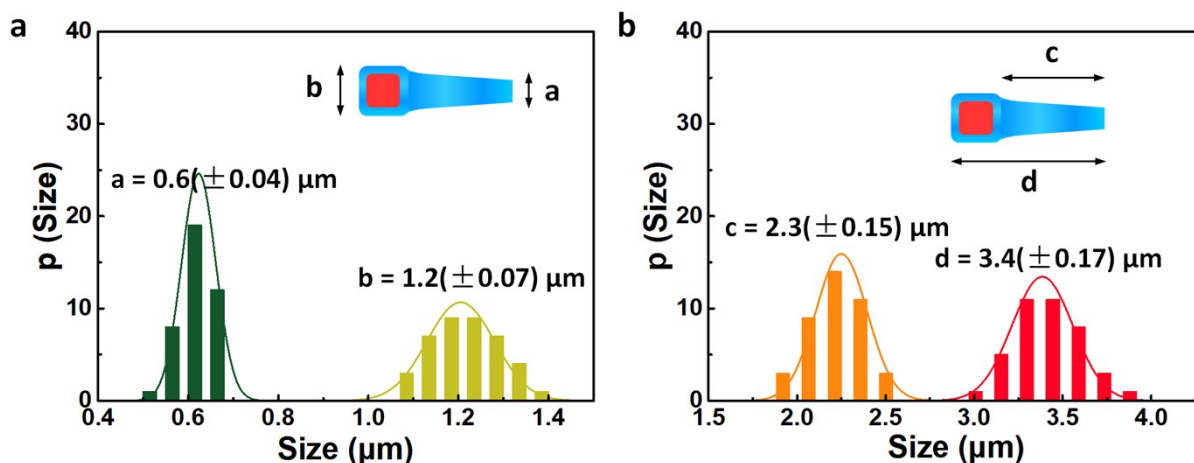

**Figure. S1** Size distribution of magnetic matchstick micromotors. The average diameter of the head and tail of the magnetic matchstick micromotor are  $1.2 \pm 0.07 \mu\text{m}$  and  $0.6 \pm 0.04 \mu\text{m}$ , respectively. The total length of the magnetic matchstick micromotor and the length of the  $\text{SiO}_2$  rod are  $3.4 \pm 0.17 \mu\text{m}$  and  $2.3 \pm 0.15 \mu\text{m}$ , respectively. The average values were calculated from measurements of  $\sim 40$  micromotors.

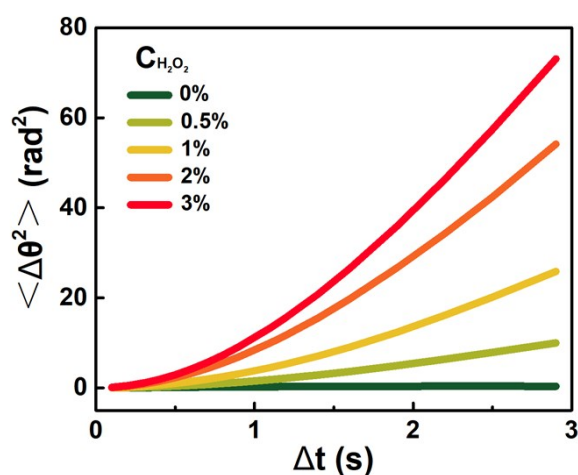

**Figure. S2** Mean-squared angular displacements ( $\langle \Delta\theta^2 \rangle$ ) for the magnetic matchstick micromotor at different  $H_2O_2$  concentrations.

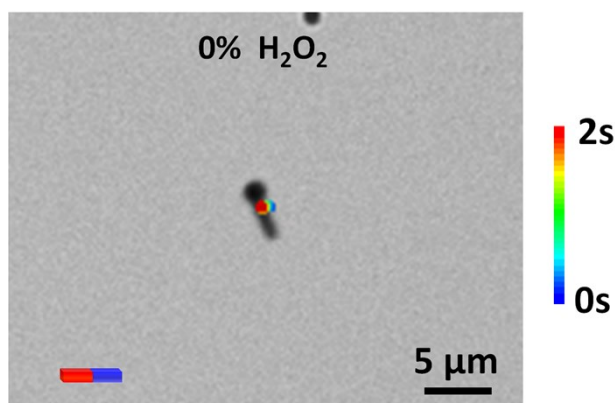

**Figure. S3** Trajectory of the magnetic matchstick micromotor moving under an external magnetic field in deionized water (i. e. 0%  $H_2O_2$ ).

### 3. Materials and Methods

#### 3.1 Materials

All the reagents were analytical grade and used without further purification. Polyvinylpyrrolidone (PVP,  $M_w = 58\,000$ ), 1-pentanol (>99%), ammonium hydroxide solution (28 wt% in water), sodium hydroxide (NaOH), anhydrous ethanol (>99.5%), sodium citrate tribasic dihydrate (ACS reagent, >99%), tetraethylorthosilicate (TEOS, >99%), iron (III) chloride ( $FeCl_3$ ) hexahydrate, and hydrogen peroxide ( $H_2O_2$ ) were obtained from Sigma-Aldrich (Shanghai) Trading Co., Ltd. Deionized water was produced by a Milli-Q Ultrapure Water System (MilliporeSigma) and was used to prepare all aqueous solutions in this work.

### 3.2 Synthesis of $\alpha$ -Fe<sub>2</sub>O<sub>3</sub> particles

Monodisperse  $\alpha$ -Fe<sub>2</sub>O<sub>3</sub> microcubes were prepared via the typical gel–sol process as described in a previous report<sup>1</sup>. Briefly, 100 mL of 2 M FeCl<sub>3</sub>·6H<sub>2</sub>O solution, 90 ml of 6 M NaOH solution, and 10 mL of deionized water were stirred and mixed thoroughly. Then the solution was moved into a 250 mL Pyrex bottle. Then the Pyrex bottle was put in an oven maintained at 100°C and react for 8 days. The final products were separated by centrifugation and washed repeatedly with deionized water and absolute ethanol, and then dried in air at 60°C for 12 h.

### 3.3 Synthesis of magnetic matchstick particles

In a typical experiment, 1.0 g of PVP (Mn = 58 kg/mol) was completely dissolved in 10 mL of 1-pentanol by sonication for 1 h. When PVP was dissolved, a dispersion of  $\alpha$ -Fe<sub>2</sub>O<sub>3</sub> microcubes in water was added, and 1 mL of anhydrous ethanol, and 100  $\mu$ L of sodium citrate aqueous solution (0.18 M), and 200  $\mu$ L of ammonia (28 wt % in water) were added into 1-pentanol solution with PVP and mixed by hand shaking for a minute. Then, 100  $\mu$ L of TEOS was introduced into the mixture. After all, ingredients were mixed by hand shaking for a minute, and the bottle was left to age at 30°C for 12 h. The products were collected by centrifugation and cleaned with a mixture of water and ethanol several times.

### 3.4 Preparation of magnetic matchstick micromotors

To fabricate the magnetic matchstick micromotors, a monolayer of magnetic matchstick particles was first formed on a glass slide by suspension casting. Then the monolayer of the magnetic matchstick particles was coated with a thin layer of Pd by sputtering with a Q150T metal sputter (Quorum Technologies). Finally, the magnetic matchstick micromotors were collected by sonication in ethanol and washed three times with distilled water.

### 3.5 Characterizations of magnetic matchstick micromotors

The morphology of the magnetic matchstick particle and the magnetic matchstick micromotor were examined by Scanning Electron Microscope (SEM, SU8010, Hitachi).

### 3.6 Optical Video Microscopy

The motion of magnetic matchstick micromotors was observed and recorded at 10 frames per second by a Basler ACE camera fitted on an Olympus IX73 microscope. For microscopy samples, the magnetic matchstick micromotors were dispersed in H<sub>2</sub>O<sub>2</sub> solutions and the dispersion was loaded in a simple rectangular inspection chamber made of glass slides and epoxy glue. To study the effect of H<sub>2</sub>O<sub>2</sub> concentrations on the motion of magnetic matchstick Janus micromotors, the concentrations were varied systemically from 0 to 3.0 %.

### 3.7 Analysis of the Motion of magnetic matchstick micromotors

The magnetic matchstick micromotor in optical micrographs was identified by image analysis using Image J (NIH), to obtain the micromotors' positional coordinates,  $x$  and  $y$ , as well as their orientation angles,  $\theta$ . The positional and orientation data were further analyzed using in-house computer programs written in IDL (Exelis) to calculate speed ( $v$ ), angular speed ( $\omega$ ), and mean-square angular displacement ( $\langle \Delta\theta^2 \rangle$ ) of the magnetic matchstick micromotors.

### 3.7 Finite Element Modeling

Our numerical model was implemented in COMSOL Multiphysics package (version 5.2a) in a 2D axisymmetric configuration to reduce the computational cost. The diameter of the head and tail of the magnetic matchstick are 1.2  $\mu\text{m}$  and 0.6  $\mu\text{m}$ , respectively. The total length of the magnetic matchstick micromotor and the length of the  $\text{SiO}_2$  rod are 3.4  $\mu\text{m}$  and 2.2  $\mu\text{m}$ , respectively. The active surface of the magnetic matchstick micromotor was modeled as a source of solute with a flux of 4.38  $\text{mmol}/\text{m}^2\cdot\text{s}^{-1}$ . The diffusion constant of  $\text{O}_2$  in water is  $2.1 \times 10^{-9} \text{ m}^2 \text{ s}^{-1}$ . The particles lay upon an inert substrate.<sup>2</sup>

### References

1. T. Sugimoto, M. M. Khan and A. Muramatsu, *Colloids Surf. A Physicochem. Eng. Asp.*, 1993, **70**, 167-169.
2. X. Liang, F. Mou, Z. Huang, J. Zhang, M. You, L. Xu, M. Luo and J. Guan, *Adv. Funct. Mater.*, 2020, **30**, 1908602.
